# Supplementary material
Source: PubMed Central journal article supplement (PMC8193416)
Supplement: 12250_2015_3693_MOESM1_ESM.pdf [file 12250_2015_3693_MOESM1_ESM.pdf]

## Electronic Supplementary Material

# The long non-coding RNA expression profile of Coxsackievirus A16 infected RD cells identified by RNA-seq

Yingying Shi<sup>1,2</sup>, Huilin Tu<sup>1</sup>, Xiong Chen<sup>1</sup>, Yingying Zhang<sup>1</sup>, Liujun Chen<sup>1</sup>, Zhongchun Liu<sup>4</sup>, Jiqun Sheng<sup>5</sup>, Song Han<sup>1</sup>, Jun Yin<sup>1</sup>, Biwen Peng<sup>1,3</sup>, Xiaohua He<sup>1,3</sup>, Wanhong Liu<sup>1,2</sup>✉

1. Pathogenic Organism and Infectious Diseases Research Institute, School of Basic Medical Sciences, Wuhan University, Wuhan 430071, China
2. Hubei Province Key Laboratory of Allergy and Immunology, Wuhan 430071, China
3. Hubei Provincial Key Laboratory of Developmentally Originated Disease, School of Basic Medical Sciences, Wuhan University, Wuhan 430071, China
4. Institute of Neuropsychiatry, Renmin Hospital, Wuhan University, Wuhan 430060, China
5. College of Life Science and Technology, Hubei Engineering University, Xiaogan 432000, China

Supporting information to DOI: 10.1007/s12250-015-3693-1

A LncRNA *cis*-acting regulatory network

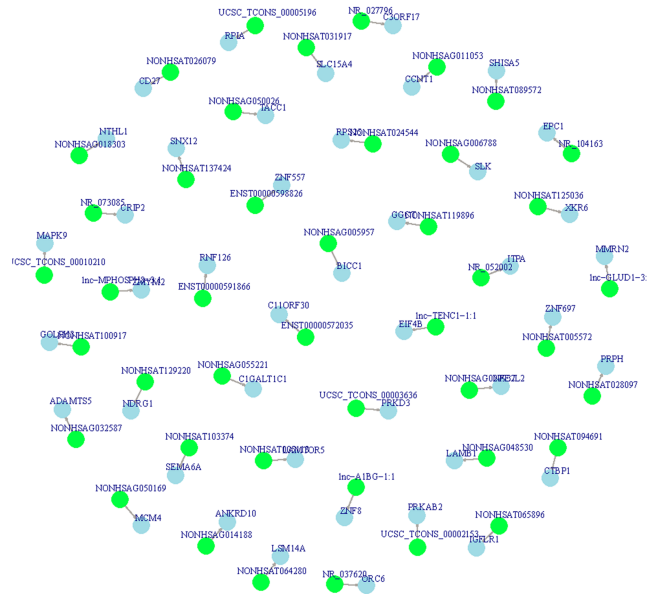

B LncRNA *trans*-acting regulatory network

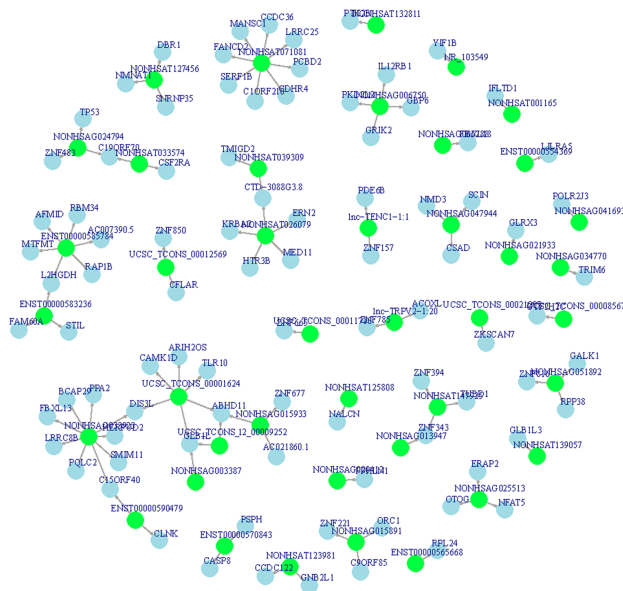

Figure S1. *Cis*-acting and *trans*-acting regulatory network. (A) *Cis*-acting regulatory network; (B) *Trans*-acting regulatory network. Red circles represent lncRNAs and blue circles represent mRNA.

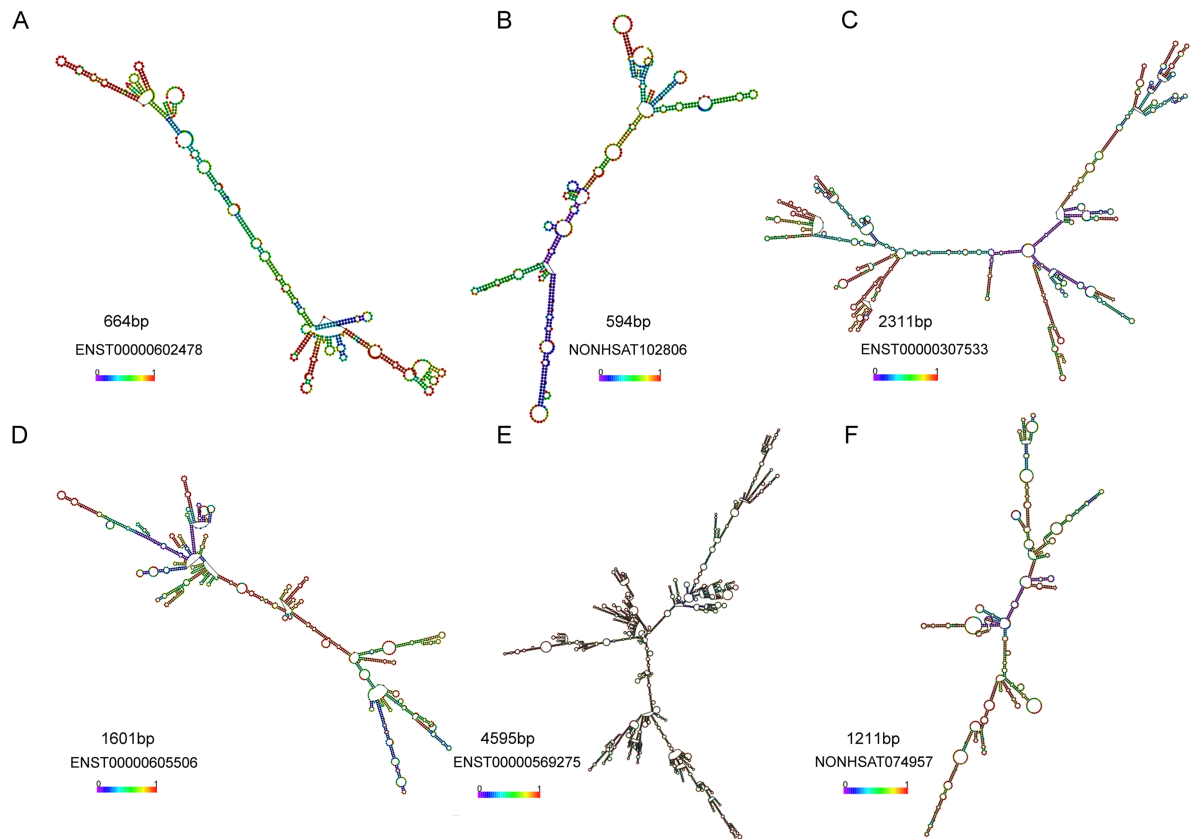

Figure S2. The secondary structures prediction of lncRNAs were performed using RNAfold software. (A–C) RNA secondary structure of three upregulated lncRNAs. (D–F) RNA secondary structure of three downregulated lncRNAs. The second structures are minimal free energy structures. Base pairing probabilities have been color coded using a scale from 0 (blue) to 1 (red).

Table S1. The 1970 differentially expressed lncRNAs expressed in RD cells after CVA16 infection

Table S2. The 6416 differentially expressed mRNAs expressed in RD cells after CVA16 infection

Table S3. *Cis*-acting lncRNA-mRNA co-expression network

Table S4. *Trans*-acting lncRNA-mRNA co-expression network
